# Supplementary material for: Utility of comprehensive genomic profiling in directing treatment and improving patient outcomes in advanced non-small cell lung cancer
Source: PubMed Central journal article supplement (PMC8485523; doi:10.1186/s12916-021-02089-z), 2021-10-01

Supplementary Figure 2

**A** Patients carrying level 1-2 alterations (Treatment-naïve when genomically profiled)

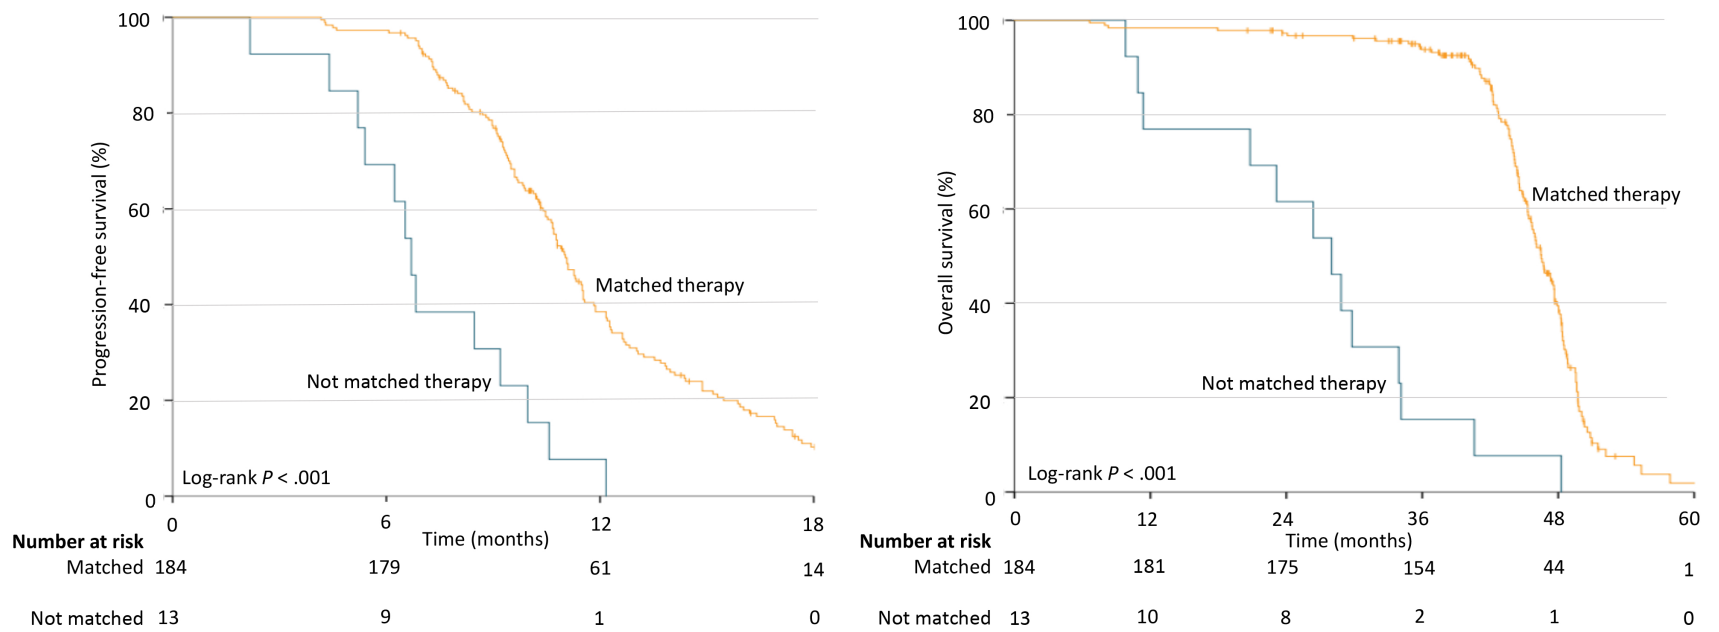

**B** Patients carrying level 1-2 alterations (Previously treated when genomically profiled)

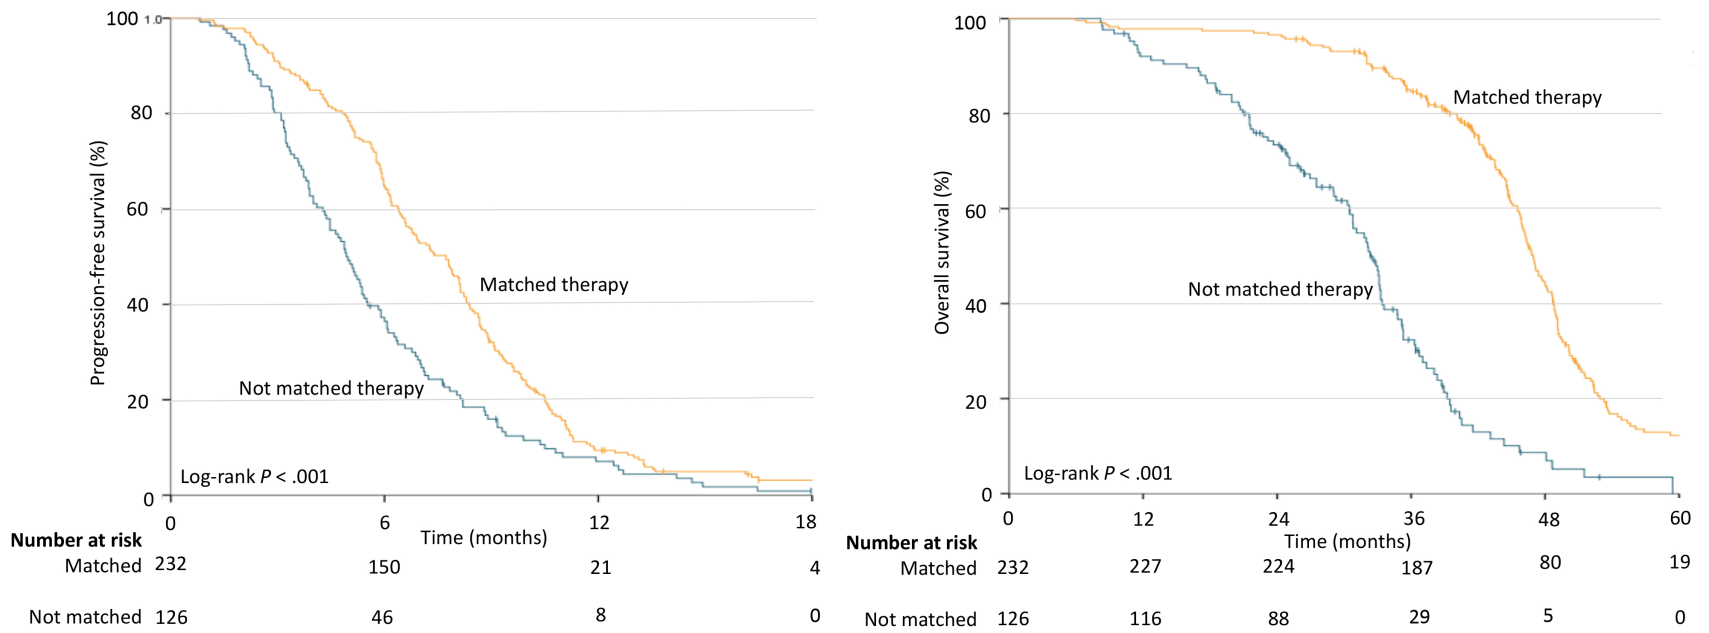

**C** Patients carrying level 3-4 alterations (Previously treated when genomically profiled)

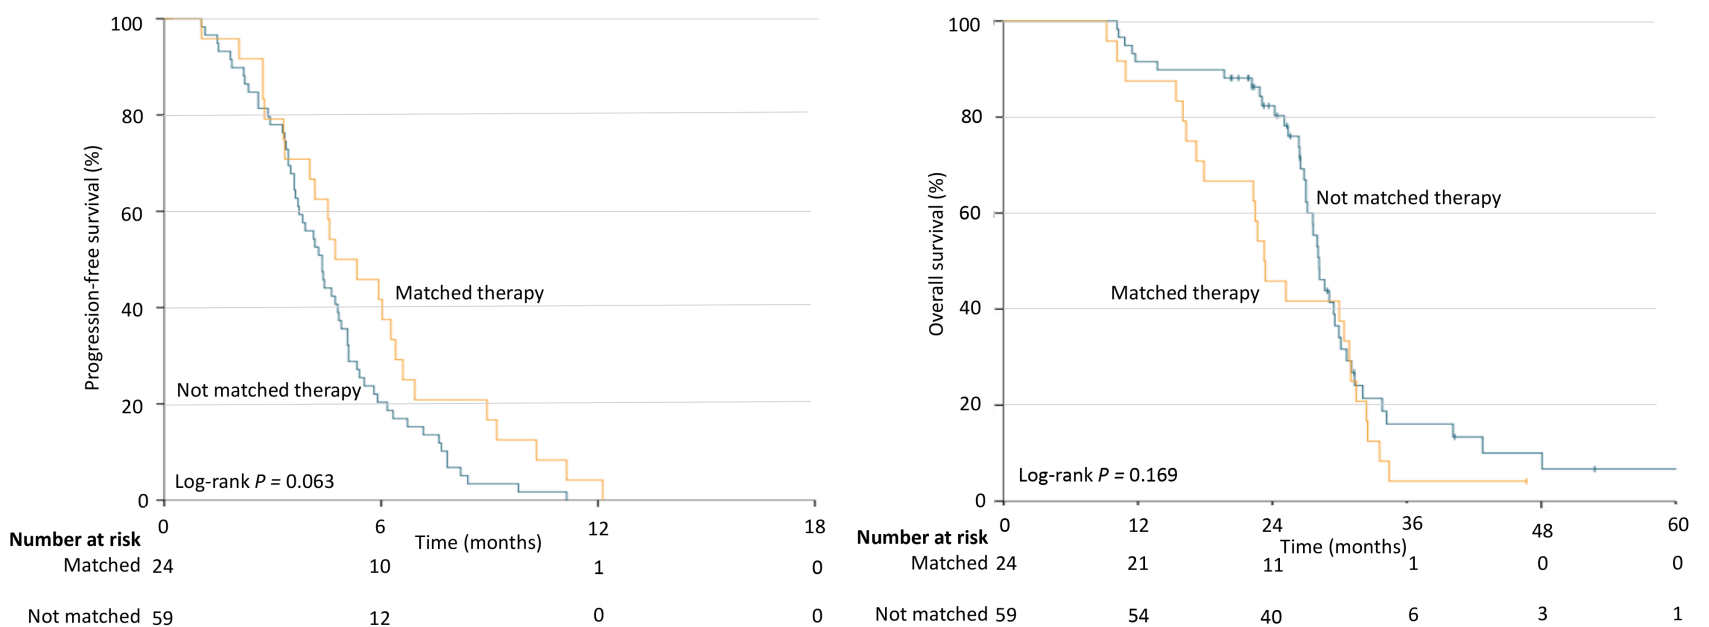

Supplement: 12916_2021_2089_MOESM5_ESM.pdf [file 12916_2021_2089_MOESM5_ESM.pdf]
