# Supplementary material for: Utility of comprehensive genomic profiling in directing treatment and improving patient outcomes in advanced non-small cell lung cancer
Source: Springer Nature journal article supplement (doi:10.1186/s12916-021-02089-z), 2021-10-01

Supplementary Figure 1

**A** Patients with lung adenocarcinomas carrying level 1-2 alterations

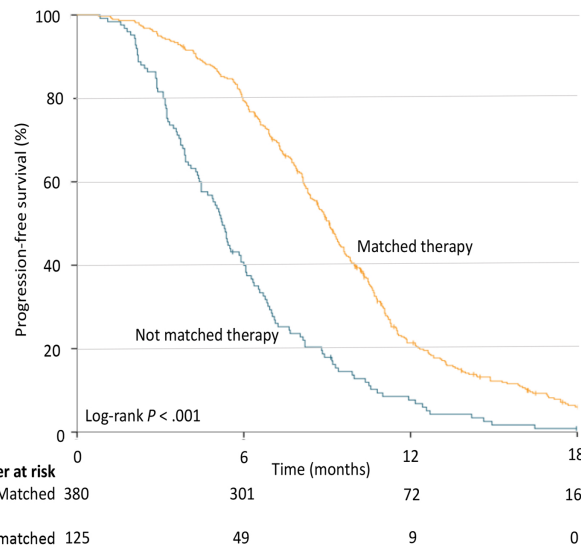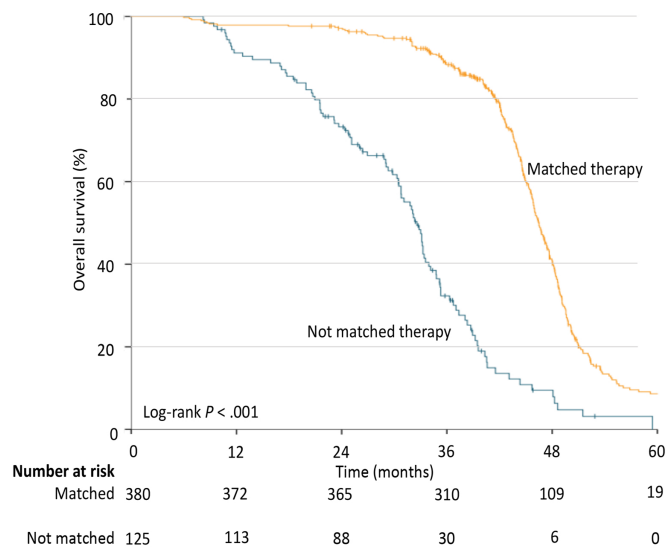

**B** Patients with lung adenocarcinomas carrying level 3-4 alterations

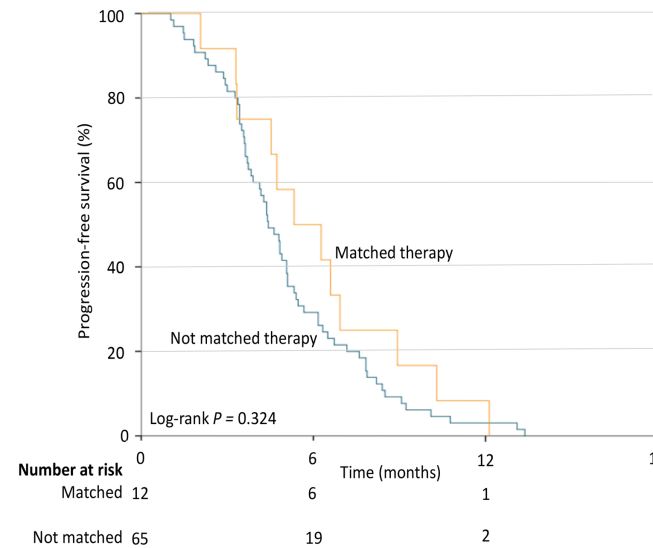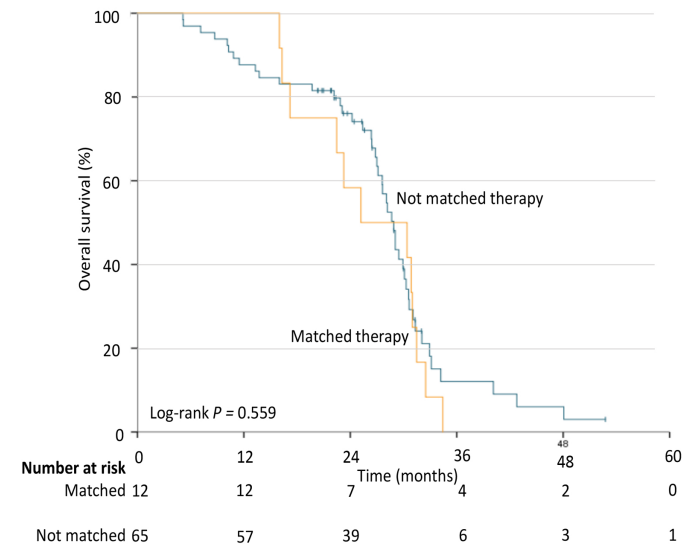

**C** Patients with NSCLC of other histologies carrying level 1-2 alterations

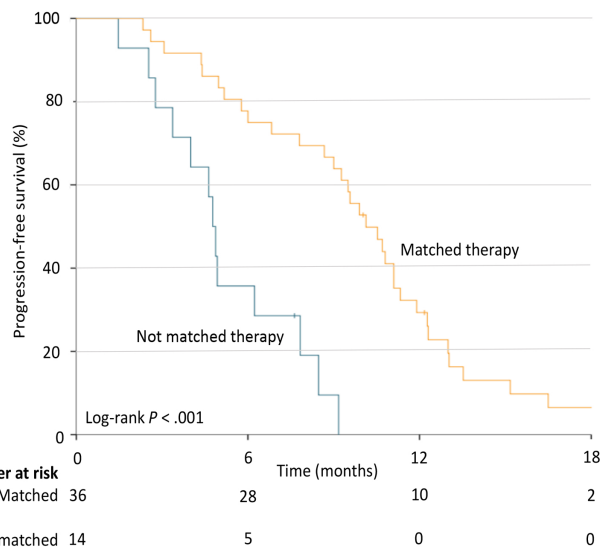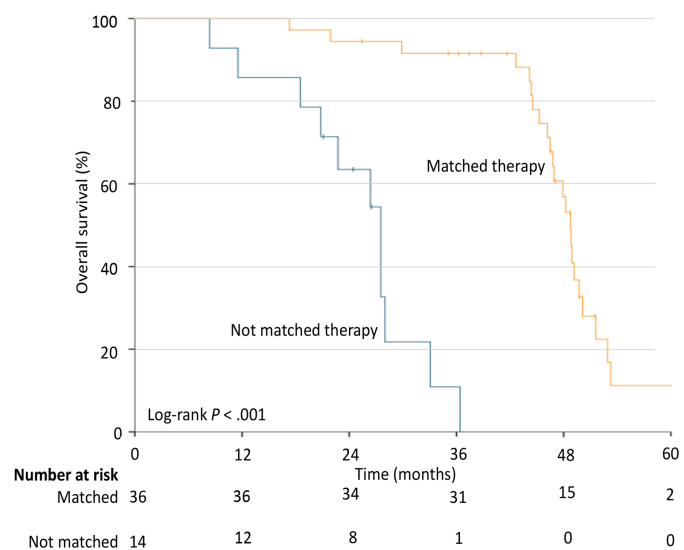

**D** Patients with NSCLC of other histologies carrying level 3-4 alterations

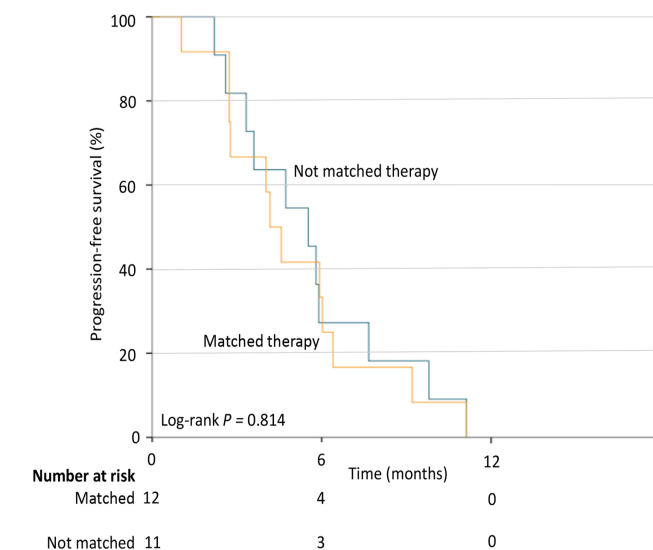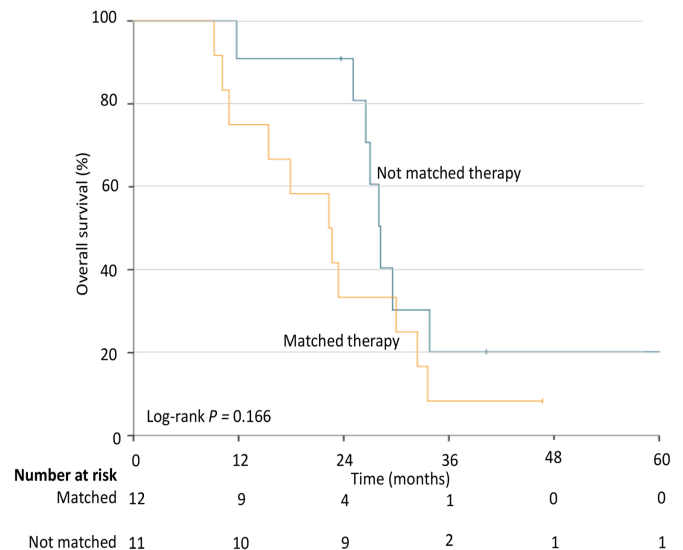

Supplement: MOESM4 [file 19720210]
